# Supplementary material for: Psychological capital mediates the association between nurses' practice environment and work engagement among Chinese male nurses
Source: PubMed Central journal article supplement — Int J Nurs Sci. 2017 Oct 4;4(4):378–83. doi: 10.1016/j.ijnss.2017.09.009 (PMC6626174; doi:10.1016/j.ijnss.2017.09.009), 2017-10-04
Supplement: mmc1.pdf [file mmc1.pdf]

## Manuscript Details

|                          |                                                                                                                                  |
|--------------------------|----------------------------------------------------------------------------------------------------------------------------------|
| <b>Manuscript number</b> | IJNSS_2017_84_R2                                                                                                                 |
| <b>Title</b>             | Psychological capital mediate the association between nurses' practice environment and work engagement among Chinese male nurses |
| <b>Article type</b>      | Research Paper                                                                                                                   |

### Abstract

**Objectives:** This study aims to investigate the environmental and individual factors contributing to male nurses' psychological well-being and to explore the psychological mechanisms that may explain the links between nurses' practice environment and work engagement, thereby presenting the implications for nurse managers. **Methods:** A total of 161 male nurses from three tertiary first-class hospitals in Changsha City in China participated in the study. We collected the data using the Practice Environment Scale of the Nursing Work Index, the Psychological Capital Questionnaire, and the Utrecht Work Engagement Scale. **Results:** Scores of male nurses' practice environment ( $2.88 \pm 0.31$ ), psychological capital ( $4.42 \pm 0.62$ ), and work engagement ( $3.17 \pm 1.39$ ) were all above the midpoint; however, the subscales "the nursing staffing and resources adequacy" ( $2.72 \pm 0.48$ ), "hope" ( $4.33 \pm 0.72$ ), and "dedication" ( $2.96 \pm 1.61$ ) scored lowest. Nurses' practice environment and psychological capital positively predicted nurses' work engagement; psychological capital fully mediated the influence of nurses' practice environment on work engagement. **Conclusions:** Creating a supportive nursing practice environment can increase male nurses' work engagement by developing their psychological capital. Nurse managers can then provide reasonable workload and pathways for male nurses to achieve goals, thereby fostering their hope.

|                                           |                                                                                    |
|-------------------------------------------|------------------------------------------------------------------------------------|
| <b>Keywords</b>                           | Male nurses, Nurses' practice environment , Psychological capital, Work engagement |
| <b>Manuscript region of origin</b>        | Asia Pacific                                                                       |
| <b>Corresponding Author</b>               | Pan xiaokang                                                                       |
| <b>Corresponding Author's Institution</b> | The Second Affiliated Hospital of Nanchang University                              |
| <b>Order of Authors</b>                   | Pan xiaokang, Mao Ting, Jingping Zhang, Wang Jianjian, Su Pan                      |

## Submission Files Included in this PDF

### File Name [File Type]

2017-8-23 Cover letter.docx [Cover Letter]

replies to editors.doc 2017-8-23.doc [Response to Reviewers (without Author Details)]

title page.doc [Title Page (with Author Details)]

IJNSS\_84 revised manuscript.docx [Manuscript (without Author Details)]

2017-84Figure.docx [Figure]

IJNSS\_84-tables.docx [Table]

INJSS\_84 (中文摘要改) .doc [Supporting File]

To view all the submission files, including those not included in the PDF, click on the manuscript title on your EVISE Homepage, then click 'Download zip file'.

Dear editors-in-chief

We had revised the manuscript as required. We submitted our manuscript entitled “psychological capital mediates the association between nurses’ practice environment and work engagement among Chinese male nurses” to the international journal of nursing science for publication. Previous studies in China found male nurses had a high turnover intention, turnover rate, and low work engagement. Work engagement describe the well-being in the workplace, we want to find solutions to improve the workplace well-being for male nurses, the solutions included environmental factors and individual factors, what’s more, we want to explore the psychological mechanisms between them, thus providing suggestions for nurse managers and male nurses. The work described has not been submitted elsewhere for publication, in whole or in part, and all the authors listed have approved the manuscript that is enclosed. I have read and have abided by the statement of ethical standards for manuscripts submitted to the international journal of nursing science. Thank you for your attention and consideration.

Sincerely yours,

Pan xiaokang.

**To editors**

Thank you for suggestions about this article. I had done some modifications as follows.

1. the score of the three variables had been added to the abstract; the data was (mean  $\pm$  SD) .
2. The statistical symbols, including "n" "p" "r" " $\beta$ ", were italics.
3. The file "table" was uploaded.
4. The Chinese name of all the authors had been added in the Chinese abstract.
5. The references had been revised.

Yours sincerely

Pan Xiaokang

## Psychological capital mediate the association between nurses' practice environment and work engagement among Chinese male nurses

Xiaokang Pan <sup>a</sup>, Ting Mao <sup>b</sup>, Jingping Zhang <sup>b\*</sup>, Jianjian Wang <sup>c</sup>, Pan Su <sup>d</sup>

<sup>a</sup>Department of nursing, The Second Affiliated Hospital of Nanchang University, Nanchang, [xkangpan@126.com](mailto:xkangpan@126.com)

No.1, Mingde Road, Nanchang, Jiangxi, 330006,China.

<sup>b</sup>Nursing Psychology Research Center of Xiangya Nursing School, Changsha, Ting Mao [4704266@qq.com](mailto:4704266@qq.com).

No.172, Tongzipo Road, Changsha,Hunan,410013,China.

<sup>b</sup>Jingping Zhang [jpzhang1965@163.com](mailto:jpzhang1965@163.com)

No.172, Tongzipo Road, Changsha,Hunan,410013,China.

<sup>c</sup>Department of nursing, The Second Xiangya Hospital of Central South University, Changsha, [29657365@qq.com](mailto:29657365@qq.com)

No.139, Renming Middle Road, Changsha, Hunan,5560000,China.

<sup>d</sup>Department of nursing, The First Xiangya Hospital of Central South University, Changsha, China [137891027@qq.com](mailto:137891027@qq.com)

No.87,Xiangya Road, Changsha, Hunan, 410008, China

### Correspondence

Jingping Zhang Nursing Psychology Research Center of Xiangya Nursing School No.172, Tongzipo Road, Changsha,Hunan,410013,China.

E-mail: [jpzhang1965@163.com](mailto:jpzhang1965@163.com)

Telephone:13873127168

### Author biographies

Mr. Pan is a registered nurse and a master graduate. Recently, his research has focused on investigating nurses' working environment and nurses' psychological well-being.

Ms. Mao is a teacher and a PhD candidate of Xiangya Nursing School, Central South University. Her research has focused on the resilience of nursing students.

Dr. Zhang is a professor and the director of Nursing Psychology Research Center of Xiangya Nursing School, Central South University, she has many publications concerning healthcare disturbance in the workplace, the resilience of parents who have lost their only child, depression and social support of empty-nest older, depression status of patients with non-small cell lung cancer in different international nursing journals.

Mr. Wang is a registered nurse, a master graduate from Xiangya Nursing School, Central South University, and the head nurse of Psychiatric Department of The Second Xiangya Hospital of Central South University. His research has focused on work-related injuries and stress disorders.

Mr. Su is a registered nurse, a master graduate from Xiangya Nursing School, Central South University. His research has focused on the resilience of male nursing student.

# Psychological capital mediates the association between nurses' practice environment and work engagement among Chinese male nurses

## Abstract

*Objectives:* This study aims to investigate the environmental and individual factors contributing to male nurses' psychological well-being and to explore the psychological mechanisms that may explain the links between nurses' practice environment and work engagement, thereby presenting the implications for nurse managers.

*Methods:* A total of 161 male nurses from three tertiary first-class hospitals in Changsha City in China participated in the study. We collected the data using the Practice Environment Scale of the Nursing Work Index, the Psychological Capital Questionnaire, and the Utrecht Work Engagement Scale.

*Results:* Scores of male nurses' practice environment ( $2.88 \pm 0.31$ ), psychological capital ( $4.42 \pm 0.62$ ), and work engagement ( $3.17 \pm 1.39$ ) were all above the midpoint; however, the subscales "the nursing staffing and resources adequacy" ( $2.72 \pm 0.48$ ), "hope" ( $4.33 \pm 0.72$ ), and "dedication" ( $2.96 \pm 1.61$ ) scored lowest. Nurses' practice environment and psychological capital positively predicted nurses' work engagement; psychological capital fully mediated the influence of nurses' practice environment on work engagement.

*Conclusions:* Creating a supportive nursing practice environment can increase male nurses' work engagement by developing their psychological capital. Nurse managers can then provide reasonable workload and pathways for male nurses to achieve goals, thereby fostering their hope.

*Key words:* Male nurses, Nurses' practice environment, Psychological capital, Work engagement

## 1 Introduction

Male nurses comprise a small group of caregivers in hospital settings in China, but they are important for providing clinical nursing care; furthermore, attracting and retaining male nurses can alleviate the shortage of nurses to some degree. However, nurse managers are frustrated with the higher burnout, turnover intention, and lower work engagement of male nurses than those of female nurses[1, 2]. In recent years, positive psychological movement have provided nurse managers with a new perspective, in that more male nurses will be attracted and have improved psychological well-being if their strengths and capabilities are developed. Nurses' work engagement and psychological capital are important positive psychological concepts that describe the positive psychological well-being and state of nurses[3, 4]. Work engagement refers to a fulfilling and persistent work-related state of mind characterized by vigor (high level of energy, physical activation, and mental resilience in the work), dedication (high identification to one's work, feelings of meaning, pride, enthusiasm, and challenge), and absorption (happily immersed in the work)[5]. Nurses' work engagement is associated with their psychological well-being[3]. Nurses' psychological capital describes their positive psychological state, which includes four important personal resources (i.e., self-efficacy, hope, optimism, and resiliency) that can be measurable, developed, and managed[4]. Self-efficacy describes an individual's conviction about his/her ability to accomplish challenging tasks. Hope is defined as a positive motivational state; individuals with high hope set realistic goals and find pathways to achieve these goals. Optimism is an explanatory style; optimists explain good events as being permanent, universal, and internal. Resilience describes one's capacity to recover from adversity, setbacks, failure, or even positive changes.

We used the JD-R theory to explain the association between job demands, job resources, work engagement, and psychological capital. Employees' work engagements are not only influenced by two main pathways (an energy-costing pathway induced by job demands and a motivational pathway induced by job resources), but also by personal resources (e.g., psychological capital)[6]. Job demands are "the physical, social, or organizational aspects of the job that require sustained physical, physiological effort or skill ... and are associated with certain physiological and/or psychological cost"[6]. According to the motivational potential, job demands can be further classified into hindrance job demands, which promote a health-impairment process, and challenging job demands, which can positively predict work engagement when an individual has abundant job resources or personal resources. This finding can explain why nurses with work-family conflicts and role stresses have low work engagement[5, 7, 8], whereas nurses with support, recognition, and person-job fit keep high work engagement when they are faced with high workload or challenging job tasks[9]. Job resources are the physical, psychological, social, or organizational aspects of the job that decrease the costs of the associated of physiological and psychological efforts of job demands, and these aspects stimulate personal growth, learning, and development[10]. A supportive practice environment provides nurses with job resources and positively predicts nurses' work engagement[11, 12]. As a positive psychological state, work engagement positively predicts job performance, job behaviors, and job attitudes[6]. Nurses with high work engagement, compared with those with low work engagement, will provide patients with better nursing services, have more out-of-role behaviors, higher organizational commitment, higher job satisfaction, lower turnover intention, and create a better clinical learning environment for nursing students[2, 13-16]. Furthermore, work engagement plays mediating/moderating roles. For example, transformational leadership positively predicts nurses' extra-role performance by fostering nurses' work engagement and self-efficacy[14]. Many empirical studies have investigated the role of personal resources in predicting nurses' work engagement. For example, Garrosa[5] found that nurses with personal resources, which include hardy personality, optimism, emotional competence, and self-efficacy, have high work engagement and play moderating roles to alleviate the negative effects of role stress on work engagement. Boamah[17] found that psychological capital is positively correlated with nurses' work engagement. Moreover, personal resources play a mediating role, and psychological capital alleviates nurses' burnout by influencing their coping style[18]; work-family conflicts increase nurses' burnout and depressive symptoms by decreasing their psychological capital[8, 19].

Magnet hospitals have advantage in attracting and retaining excellent nurses for a supportive practice environment; moreover, this environment has positive influence on nurses. A supportive practice environment can foster nurses' work engagement, job satisfaction, and decrease nurses' burnout[11, 12, 15, 20, 21]. As far as we can search, no study has explored the mediating role of psychological capital between nurses' practice environment and work engagement in male nurses. In addition, few studies on this subject regarding male nurses can be referred to. Based on JD-R theory, Luthans's et al. psychological capital theory and literature link nurses' practice environment with nurses' outcomes. We hypothesized that a supportive nurses' practice environment, which is characterized by abundant job resources (e.g., opportunities, support, information, performance feedback, recognition, flexible scheduling shift, good nurse executive, cooperation, trust, and good atmosphere for mutual help and communication), reasonable challenging job demands (e.g., workload and challenging job tasks), and less hindrance job

demands (e.g., role stress, abusive supervision, work–family conflict ,and emotional labor), would be related to increased levels of male nurses’ work engagement, and this process is fully mediated by psychological capital, as shown in Figure 1.

## **2 Methods and materials**

### **2.1 Design and sample**

This study used a descriptive cross-sectional quantitative design to assess registered male nurses. Participants were 180 male nurses working in three first-class and well-known hospitals in Changsha City in China. Inclusion criteria were met if participants were registered male nurses employed in a direct-care nursing position for more than 6 months.

### **2.2 Measurement tool**

#### **2.2.1 Social-demographic questionnaire**

The demographics questionnaire was designed to obtain the male nurses’ social-demographic information, such as age, educational level, year(s) working, and thoughts or behaviors of hiding their identity as clinical nurses.

#### **2.2.2 Utrecht work engagement scale**

The Chinese version of Utrecht work engagement scale developed by Zhang et al.[22] was used. This scale has 3 dimensions: vigor contains 6 items, dedication contains 5 items, and absorption contains 6 items. All items are scored on a Likert scale from 0 (never) to 6 (always). In the study, the overall Cronbach’s  $\alpha$  for the scale was 0.95; alphas for vigor, dedication, and absorption were 0.89, 0.89, and 0.88 respectively.

#### **2.2.3 Practice Environment Scale of the Nursing Work Index**

The Chinese version of Practice Environment Scale of the Nursing Work Index (PES-NWI) developed by Zhang et al.[15] was used. The scale has 5 dimensions and 31 items: nurse participation in hospital affairs (9 items); nursing foundations for quality care (10 items); nursing managers’ ability, leadership and support of nurses (5 items); staffing and resource adequacy (4 items); and collegial nurse–physician relations (3 items). All the items are scored on a Likert scale from 1 (strongly disagree) to 4 (strongly agree)[20]. In the study, the overall Cronbach’s  $\alpha$  for the scale was 0.91, and Cronbach’s  $\alpha$  for each subscale were 0.83, 0.74, 0.66, 0.65, and 0.60.

#### **2.2.4 Psychological Capital Questionnaire**

The Chinese version of Psychological Capital Questionnaire developed by Luo et al.[23] was used. The tool has 4 subscales and 24 items: self-efficacy, hope, optimism, and resilience; each subscale contains 6 items. All the items are scored on a Likert scale from 1 (strongly disagree) to 6 (strongly agree). In the study, the overall Cronbach’s  $\alpha$  for the scale was 0.93. Cronbach’s  $\alpha$  of self-efficacy, hope, optimism, and resilience were 0.85, 0.84, 0.84, and 0.80 respectively.

### **2.3 Data collection**

Before the investigation, three male nurses working in the hospitals were trained as research assistants for data collection. After receiving approval from the Department of Nursing in the three hospitals, at a convenient time, the assistants distributed questionnaires in a packet to the male nurses during September 2014 to January 2015. Male nurses were informed to finish the

questionnaires within 2 weeks and return the questionnaires to the assistants. Finally, 161 questionnaires were completed and returned, resulting in an 89.4% response rate. All of the 161 questionnaires were qualified.

#### **2.4 Ethical consideration**

In the research, the researchers followed all ethical principles. Before using the Chinese version of PES-NWI, the researchers obtained authorization from the original authors as required. Before distributing the questionnaires, the researchers obtained formal permissions from the deans of the nursing departments in the three hospitals. On the cover page of the questionnaire, the researchers explained the aim of the study. Male nurses participated in the research voluntarily; the participants had the option of not finishing the questionnaires at any time without any consequence. After the questionnaires were collected, the three assistants strictly protected the data, which were used only for academic research.

#### **2.5 Data analysis**

The study employed SPSS 17.0 and AMOS 17.0 for data analysis; the statistical methods included descriptive statistics (e.g., frequency, percentage, mean, standard deviation, and correlation analysis) and structural equation modeling with maximum likelihood estimation. Absolute goodness-of-fit indices calculated were chi-square goodness-of-fit statistics, root mean square error of approximation (RMSEA), goodness-of-fit index (GFI), and adjusted goodness-of-fit index (AGFI)[24]. Significant values of chi-square ( $P < 0.05$ ) indicate that the hypothesized model should be rejected. The value of chi-square/df between 1 and 2 is necessary for an acceptable hypothesis model[25]. The calculated relative goodness-of-fit indices were non-normed fit index (NNFI), incremental fit index (IFI), and comparative fit index (CFI). GFI, AGFI, NNFI, IFI, and CFI values larger than 0.90 indicate a good model fit; the value of RMSEA smaller than 0.08 indicates an acceptable fit, and value greater than 0.1 means that the model should be rejected[26].

### **3 Results**

#### **3.1 Demographics information**

Among the 161 male nurses, 143 (88.8%) were aged 21–29 years, and 131 have worked for 1–5 years (81.4%). Most of the male nurses were young, unmarried, and have worked for 1–5 years; most of them (72%) have bachelor's degrees and were distributed in the different departments, which included surgery, operating room, and intensive care units. The study further reflected some characteristics of male nurses. On one hand, they received pressure, prejudice, and misunderstanding from the society, because 60.9% of them have had thoughts or behaviors of hiding their identity as clinical nurses; and 25.5% of them have had experiences in failing in love given their identity. On the other hand, surprisingly, 56.5% male nurses chose nursing in college entrance examinations (Table 1).

#### **3.2 Descriptive statistics**

Table 2 shows the descriptive statistics and Cronbach's reliability coefficients of each variable in the study. Scores of nurses' practice environment, psychological capital, and work engagement are all higher than the midpoint.

#### **3.3 Correlation coefficients**



Statistically significant positive correlations were found between nurses' practice environment and work engagement ( $r=0.355$ ,  $P<0.01$ ), nurses' practice environment and psychological capital ( $r=0.516$ ,  $P<0.01$ ), and psychological capital and work engagement ( $r=0.509$ ,  $P<0.01$ ). Table 3 shows the correlations between the dimensions of each variable.

### 3.4 Testing of the research model

The study tested a partially mediated model (NPE→PC→WE, NPE→WE), which includes the direct effect, and a fully mediated model (NPE→WE=0, constraining coefficients of the path from NPE to WE as zero). Table 4 displays the fit indices of the two model comparisons. The fully mediated model was the only model that had a good fit with the data, because all fit indices were higher than 0.95, RMSEA was lower than 0.08, and the chi-square test was not statistically significant ( $P=0.05$ ). However, the chi-square test of the partially mediated model was statistically significant ( $P<0.05$ ). In conclusion, data supported a fully mediated model, in which psychological capital fully mediated the effect of nurses' practice environment on work engagement.

The tested hypothesized model is presented in Figure 2, where the standardized path coefficients are depicted. The predicted paths (NPE→PC and PC→WE) are statistically significant ( $P<0.05$ ), with a saturated model and a perfect fit; the path from NPE to WE is statistically insignificant ( $P>0.05$ ) (Table 4).

### 3.5 Examination of the full mediating role of psychological capital

Table 5 shows the total, direct, and indirect effects of independent variables on dependent variables. Nurses' practice environment is directly related to psychological capital ( $\beta=0.572$ ,  $P<0.01$ ) and psychological capital is directly related to work engagement ( $\beta=0.638$ ,  $P<0.01$ ). The indirect effect from nurses' practice environment to work engagement is statistically significant ( $\beta=0.365$ ,  $P<0.01$ ) and the direct effect is statistically insignificant ( $\beta=0.07$ ,  $P>0.05$ ). The hypothesized model is accepted.

## 4 Discussion

Compared with female nurses, male nurses in China are a small group, which provides them some advantages in searching for a job in tertiary first-class hospitals in big cities. Male nurses investigated in the study work in three well-known hospitals in China, which are ranked in the top 100. Furthermore, the study had a high effective response rate. These factors contributed to the representation of the participants and enhanced the general significance of the conclusions in the study.

The score of nurses' practice environment was higher than the midpoint of 2.5 and higher than the score in Zhang's research, which investigated nurses across China [15]. Consistent with Wang's research, male nurses in the study were satisfied with the collegial nurse-physician relations and the nurse managers' ability, leadership, and support for them [21]. However, the nursing staff and resources were inadequate. The score of psychological capital was higher than the midpoint of 3.5; most of the male nurses in the study were optimistic, whereas, hope dimension scored lowest, which indicated that male nurses in the study did not have clear goals or lacked the pathways towards the goals. The score of work engagement was higher than the midpoint of 3; male nurses in the study had high vigor and absorption, which means that male nurses had high levels of energy in the work and happily concentrated on their work. However, dedication scored lowest, which means that male nurses in the study should have improved

enthusiasm, pride, significance, and inspiration from clinical nursing work.

Results of the study supported the hypothesis model, in which supportive nurses' practice environment, psychological capital, and work engagement were positively correlated; these results are consistent with previous empirical studies. For example, Wang et al.[12]investigated the positive influence of supportive nurses' practice environment on nurses' work engagement in our country; Boamah et al.[17]and Laschinger et al.[11]identified the positive relationship between psychological capital and work engagement. As far as we know, the study is the first to find that male nurses in a supportive practice environment have improved psychological capital. As for the psychological mechanisms between nurses' practice environment and work engagement, Wang et al.[12]investigated registered clinical nurses and found the mediating role of psychological empowerment. This study further enriches the psychological mechanisms; the full mediating role of psychological capital demonstrates that male nurses in a supportive practice environment will be more confident, optimistic, resilient, and filled with hope, and thus have improved work engagement; these findings emphasize the importance of developing male nurses' psychological capital in fostering their psychological well-being.

## **5 Conclusions**

Creating a professional nurses' practice environment can increase male nurses' work engagement by developing psychological capital; therefore, we should pay attention to the full mediating role of psychological capital. To increase male nurses' psychological well-being, strategies aimed at creating a professional nurses' practice environment and fostering psychological capital should be taken up. Several suggestions are presented in the study to retain more nurses and increase their psychological well-being at work. The first recommendation is to create a professional nurses' practice environment. Specially, sufficient nursing staff and resources should be available. Furthermore, if male nurses receive positive performance feedback, support, empowerment, pathways to be professional, and recognition from family members, society, and colleagues, then the male nurses will experience improved inspiration, enthusiasm, and challenges from the work; moreover, they will be capable of increased workload and challenging tasks, thereby experiencing enhanced psychological well-being. The second recommendation is to develop male nurses' psychological capital, especially hope. Nurse managers can help male nurses set professional goals and provide opportunities for them to achieve their goals. The third recommendation is that male nurses should try their best to make full use of resources and positively cope with job demands in the workplace, thereby developing their psychological capital and psychological well-being.

## **Conflict of Interest**

The author(s) declare no potential conflict of interest with respect to the research, authorship, and/or publication of this article.

## **Acknowledgments**

The authors thank the male nurses who participated in the study and finished the questionnaires ,as well as the statistical experts for their help and advice.

## References

- [1]Teng X, Dai H, Sun C. Investigation on job burnout ,self-esteem and turnover intention of male nurses. *Chinese Nursing Research* 2011; 70.
- [2]Ahmad EA, Hanadi Y, HamadiO SA, NazikM, Zakari A.The work engagement of nurses in multiple hospital sectors in Saudi Arabia: a comparative study. *Journal of Nursing Management* 2016; 24(4): 540.
- [3]Schaufeli WB. *What is Engagement?* Routledge 2014.
- [4]Luthans F, Youssef CM, Avolio BJ. Psychological capital: Developing the human competitive edge. *Journal of Asian Economics* 2007; 8(2): 315-32.
- [5]Eva G, Bernardo MJ, Alfredo RM, Raquel RC. Role stress and personal resources in nursing: a cross-sectional study of burnout and engagement. *International Journal of Nursing Studies* 2011; 48(4): 479-89.
- [6]Bakker AB, Demerouti E,Sanz-Vergel AI.Burnout and work engagement : the JD-R approach. *Annual Review of Organizational Psychology & Organizational Behavior* 2014; 1(1).
- [7]Fragoso ZL,Holcombe KJ,Mccluney CL,Fisher GG,Mcgonagle AK,Friebe SJ.Burnout and Engagement: Relative Importance of Predictors and Outcomes in Two Health Care Worker Samples. *Workplace Health & Safety* 2016; 64(10).
- [8]Hao J, Wu D, Liu L,Li X, Wu H. Association between Work-Family Conflict and Depressive Symptoms among Chinese Female Nurses: The Mediating and Moderating Role of Psychological Capital. *International Journal of Environmental Research & Public Health* 2015; 12(6): 6682-99.
- [9]Bamford M, Wong CA, Laschinger H.The influence of authentic leadership and areas of worklife on work engagement of registered nurses. *J Nurs Manag* 2013; 21(3): 529-40.
- [10]Demerouti E, Bakker AB, Nachreiner F,Schaufeli WB. A model of burnout and life satisfaction amongst nurses. *Journal of Advanced Nursing* 2000; 32(2): 454-64.
- [11]Spence HK,Grau AL, Finegan J, Wilk P.Predictors of new graduate nurses' workplace well-being: testing the job demands-resources model. *Health Care Management Review* 2011; 37(2): 175-86.
- [12]Shanshan W, Yanhui L.Impact of professional nursing practice environment and psychological empowerment on nurses' work engagement: test of structural equation modeling. *Journal of Nursing Management* 2015; 23(3): 287-96.
- [13]Abdelhadi N, Drachzahavy A. Promoting patient care: work engagement as a mediator between ward service climate and patient-centred care. *Journal of Advanced Nursing* 2012; 68(6): 1276-87.
- [14]Salanova M,Lorente L,Chambel MJ. Martínez IM. Linking transformational leadership to nurses' extra-role performance: the mediating role of self-efficacy and work engagement. *Journal of Advanced Nursing* 2011;67(10): 2256-66.
- [15]Zhang LF, You LM, Liu K, Zheng J, Fang JB, Lu MM et al.The Association of Chinese Hospital Work Environment with Nurse Burnout, Job Satisfaction, and Intention to Leave. *Nursing Outlook* 2014;62(2): 128-37.
- [16]Tomietto M, Comparcini D, Simonetti V, Pelusi G, Troiani S,Saarikoski M et al. Work-engaged nurses for a better clinical learning environment:a ward-level analysis. *Journal of Nursing Management* 2016;24(4): 475-82.
- [17]Lingg H. Engaging new nurses: the role of psychological capital and workplace empowerment. *Journal of Research in Nursing* 2014;20(4): 265-77.
- [18]Yongqing D,Yanjie Y , Xiuxian Y, Tiehui Z, Xiaohui Q, Xin He et al.The Mediating Role of Coping Style in the Relationship between Psychological Capital and Burnout among Chinese Nurses.

Plos One 2015;10(4): e0122128.

[19]Yang W, Chang Y,Jialiang F,Lie W. Work-family conflict and burnout among Chinese female nurses: the mediating effect of psychological capital. BMC Public Health 2012;12(1): 1-8.

[20]Lake ET. Development of the practice environment scale of the Nursing Work Index. Research in Nursing & Health 2002; 25(3): 176-88.

[21]Ying W,Weizhegn D, Mauk K,Peiying L, Jin Wan,Yang G et al. Nurses' Practice Environment and Their Job Satisfaction: A Study on Nurses Caring for Older Adults in Shanghai. Plos One 2015;10(9): e0138035.

[22]Yiwei Z,Yiqun Gan.The Chinese Version of Utrecht Work Engagement Scale: An Examination of Reliability and Validity. Chinese Journal of Clinical Psychology 2005.

[23]Luo H, He ZH.The relationships among psychological capital,job burnout and turnover intention in 466 nurses. Chinese Journal of Nursing 2010.

[24]Hair JF, Anderson RE, Tatham RL, Black WC.Multivariate Data Analysis, 5th Ed. All Publications 1998.

[25]Carmines EG, Mciver JP. Analyzing Models With Unobserved Variables: Analysis of Covariance Structures. Social Measurement. Current Issues 1981; 10.

[26]Browne MW, Cudeck R.Alternative Ways of Assessing Model Fit. Sociological Methods & Research 1992;21(2): 230-58.

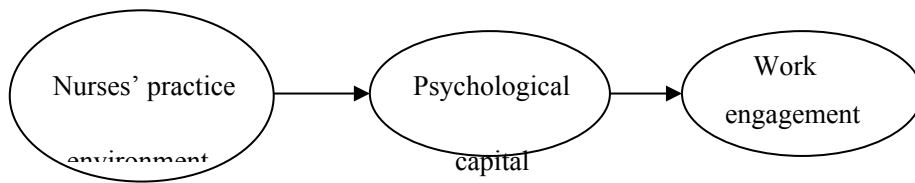

Figure 1. The hypothesized research model

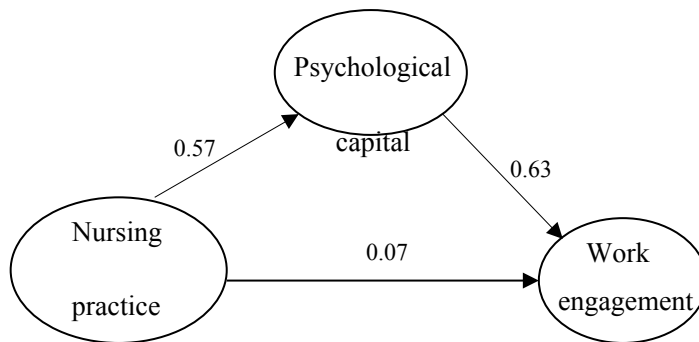

$\chi^2/df = 1.41$ , GFI = 0.953, CFI = 0.989, RMSEA = 0.051

Figure 2. Final research model with standardized path coefficients

**Table 1**  
Demographic information of the male nurses ( $n = 161$ )

| Variables                                                                 | <i>n</i> (%) |
|---------------------------------------------------------------------------|--------------|
| Age                                                                       |              |
| 21 - 24                                                                   | 77 (47.8)    |
| 25 - 29                                                                   | 66 (41.0)    |
| $\geq 30$                                                                 | 18 (11.2)    |
| Year(s) of working                                                        |              |
| 1 - 5                                                                     | 131 (81.4)   |
| 6 - 10                                                                    | 26 (16.1)    |
| 11 - 30                                                                   | 4 (2.5)      |
| Department                                                                |              |
| Surgery                                                                   | 19 (11.8)    |
| Operating room                                                            | 40 (24.8)    |
| ICU                                                                       | 64 (39.8)    |
| Others                                                                    | 38 (23.6)    |
| Marital status                                                            |              |
| Unmarried                                                                 | 114 (70.8)   |
| Married                                                                   | 47 (29.2)    |
| Educational level                                                         |              |
| Secondary technical certificate                                           | 42 (26.1)    |
| Bachelor degree                                                           | 116 (72.0)   |
| Master degree                                                             | 3 (1.9)      |
| The first choice in the college entrance examination                      |              |
| Nursing specialty                                                         | 91 (56.5)    |
| Clinical medicine specialty                                               | 30 (18.6)    |
| Others                                                                    | 40 (24.9)    |
| Having thoughts or behaviors of hiding their identity as clinical nurses  |              |
| Yes                                                                       | 98 (60.9)    |
| No                                                                        | 63 (39.1)    |
| Having experiences of failing in love for the identity as clinical nurses |              |
| Yes                                                                       | 41 (25.5)    |
| No                                                                        | 120 (74.5)   |

**Table 2**

Mean, standard deviation, and the Cronbach's  $\alpha$  coefficients for the variables in the study ( $n = 161$ )

| Variable                                           | Score range | Mean $\pm$ SD   | Cronbach's $\alpha$ |
|----------------------------------------------------|-------------|-----------------|---------------------|
| Nurse practice environment                         |             | 2.88 $\pm$ 0.31 | 0.91                |
| Nurse participation in hospital affairs            | 1-4         | 2.77 $\pm$ 0.41 | 0.83                |
| Nursing foundations for quality of care            | 1-4         | 2.93 $\pm$ 0.30 | 0.74                |
| Staffing and resource adequacy                     | 1-4         | 2.72 $\pm$ 0.48 | 0.66                |
| Manager ability, leadership, and support of nurses | 1-4         | 2.96 $\pm$ 0.39 | 0.65                |
| Collegial nurse–physician relations                | 1-4         | 3.04 $\pm$ 0.36 | 0.60                |
| Psychological capital                              |             | 4.42 $\pm$ 0.62 | 0.93                |
| Self-efficiency                                    | 1-6         | 4.44 $\pm$ 0.67 | 0.85                |
| Hope                                               | 1-6         | 4.33 $\pm$ 0.72 | 0.84                |
| Optimism                                           | 1-6         | 4.55 $\pm$ 0.86 | 0.84                |
| Resiliency                                         | 1-6         | 4.42 $\pm$ 0.67 | 0.80                |
| Work engagement                                    |             | 3.17 $\pm$ 1.39 | 0.95                |
| Vigor                                              | 0-6         | 3.30 $\pm$ 1.36 | 0.89                |
| Dedication                                         | 0-6         | 2.96 $\pm$ 1.61 | 0.89                |
| Absorption                                         | 0-6         | 3.20 $\pm$ 1.44 | 0.88                |

**Table 3**

Correlation between all the dimensions of the three variables

| Variable                                           | Vigor   | Dedication | Absorption |
|----------------------------------------------------|---------|------------|------------|
| Nurse participation in hospital affairs            | 0.380** | 0.370**    | 0.344**    |
| Nursing foundations for quality of care            | 0.244** | 0.245**    | 0.274**    |
| Staffing and resource adequacy                     | 0.269** | 0.262**    | 0.212**    |
| Manager ability, leadership, and support of nurses | 0.323** | 0.296**    | 0.360**    |
| Collegial nurse–physician relations                | 0.165*  | 0.156*     | 0.163*     |
| Self-efficiency                                    | 0.460** | 0.442**    | 0.453**    |
| Hope                                               | 0.424** | 0.397**    | 0.388**    |
| Optimism                                           | 0.499** | 0.510**    | 0.497**    |
| Resiliency                                         | 0.362** | 0.346**    | 0.355**    |

\*\* $P < 0.01$  (two-tailed test), \* $P < 0.05$  (two-tailed test).



**Table 4**Fit indices for competitive models ( $n = 161$ )

| Model                      | $\chi^2$ | $df$ | $P$         | GFI      | RMSEA    | TLI      | CFI      |
|----------------------------|----------|------|-------------|----------|----------|----------|----------|
| M1<br>(NPE→PC→WE,NPE→WE)   | 51.014   | 35   | 0.039       | 0.953    | 0.053    | 0.978    | 0.989    |
| M2<br>(NPE→PC→WE,NPE→WE=0) | 51.022   | 36   | 0.050       | 0.953    | 0.051    | 0.980    | 0.989    |
| Fit criteria               | –        | –    | $\geq 0.05$ | $> 0.90$ | $< 0.08$ | $> 0.90$ | $> 0.90$ |

**Table 5**

Total, direct, and indirect effect of nurses' practice environment (standardized coefficients)

| Independent variable         | Dependent variable    |                 |
|------------------------------|-----------------------|-----------------|
|                              | Psychological capital | Work engagement |
| Nurses' practice environment |                       |                 |
| Direct effect                | 0.572**               | 0.07            |
| Indirect effect              | –                     | 0.365**         |
| Total effect                 | 0.572**               | 0.370**         |
| psychological capital        |                       |                 |
| Direct effect                | –                     | 0.638**         |
| Indirect effect              | –                     | –               |
| Total effect                 | –                     | 0.638**         |

\*\* $P < 0.01$  (two-tailed test).

# 心理资本在护理实践环境和男护士工作投入间的中介作用

潘小康, 毛婷, 张静平, 汪健健, 苏盼

## 【摘要】

**目的** 探索影响男护士心理幸福感的环境因素和个人因素, 以及护理实践环境影响男护士工作投入的心理机制, 从而为临床护理管理者制订措施提供一定的参考。

**方法** 采用护理实践环境指数量表 (Nursing Work Index-Practice Environment Scale, NWI-PES)、心理资本问卷 (Psychological Capital Questionnaire, PCQ-24) 以及工作投入量表 (Utrecht Work Engagement Scale, UWES) 对中国长沙市 3 所三级甲等医院的 161 名男护士进行调查。

**结果** 男护士护理实践环境得分为 ( $2.88\pm 0.31$ ) 分、心理资本得分为 ( $4.42\pm 0.62$ ) 分, 工作投入得分为 ( $3.17\pm 1.39$ ) 分, 均处于中等以上水平。其中, 3 个量表中得分最低的维度分别为: 护理人力资源充足 ( $2.72\pm 0.48$ ) 分、希望 ( $4.33\pm 0.72$ ) 分以及奉献 ( $2.96\pm 1.61$ ) 分。护理实践环境和心理资本都能够正向预测男护士的工作投入, 男护士心理资本在护理实践环境和工作投入之间起完全中介作用。

**结论** 改善护理实践环境能够通过增加男护士的心理资本来增加其工作投入。护理管理者可以通过提供合理的工作量, 和男护士一起制订工作目标等途径来增加他们的希望水平。

**【关键词】** 男护士; 护理实践环境; 心理资本 ; 工作投入

通信作者:张静平, E-mail:jpzhang1965@163.com
